# Supplementary material for: A water-soluble tin(iv) porphyrin as a bioinspired photosensitiser for light-driven proton-reduction
Source: Royal Society of Chemistry journal article supplement (doi:10.1039/c3cp55023k), 2014-01-01

## *Supporting Information*

# **A Water Soluble Tin(IV) Porphyrin as Bioinspired Photosensitiser for light-driven proton-reduction**

Anne-Marie Manke,<sup>a</sup> Karen Geisel,<sup>b</sup> Anne Fetzer<sup>a</sup> and Philipp Kurz<sup>\*a</sup>

<sup>a</sup> *Institute for Inorganic and Analytical Chemistry, Albert-Ludwigs-University  
Freiburg, Albertstraße 21, 79104 Freiburg, Germany; Tel: +49 7611-203-6127;  
E-mail: philipp.kurz@ac.uni-freiburg.de*

<sup>b</sup> *Institute for Physical Chemistry, RWTH Aachen University, Landoltweg 2, 52056  
Aachen, Germany.*

## Additional figures and tables

Figure S1a) <sup>1</sup>H-NMR-spectra of the TPPC ligand (left) and **1** (right) in DMSO-d<sub>6</sub>.

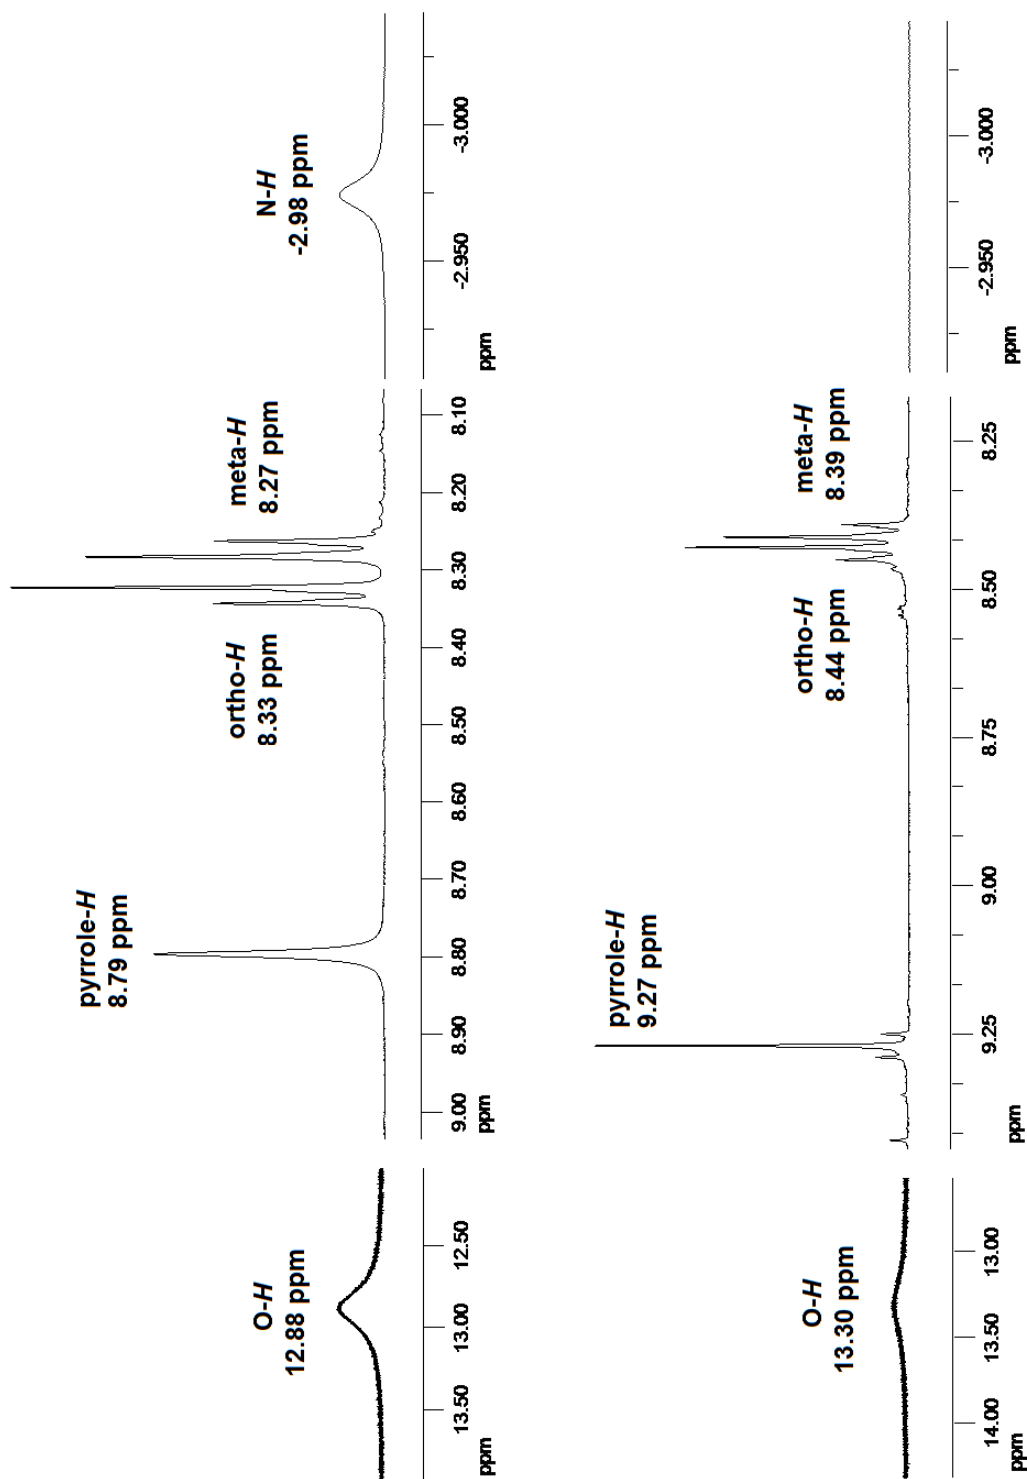

**Figure S1b)**  $^{13}\text{C}$ -NMR-spectra of the TPPC ligand (top) and **1** (below) in  $\text{DMSO-d}_6$ . The signals for the quarternary  $\text{C}=\text{N}$  and pyrrole- $\text{C}$  carbon atoms could not be observed in the  $^{13}\text{C}$ -NMR spectrum of TPPC. The slashed signals in the  $^{13}\text{C}$ -NMR spectrum of **1** belong to pyridine impurities.

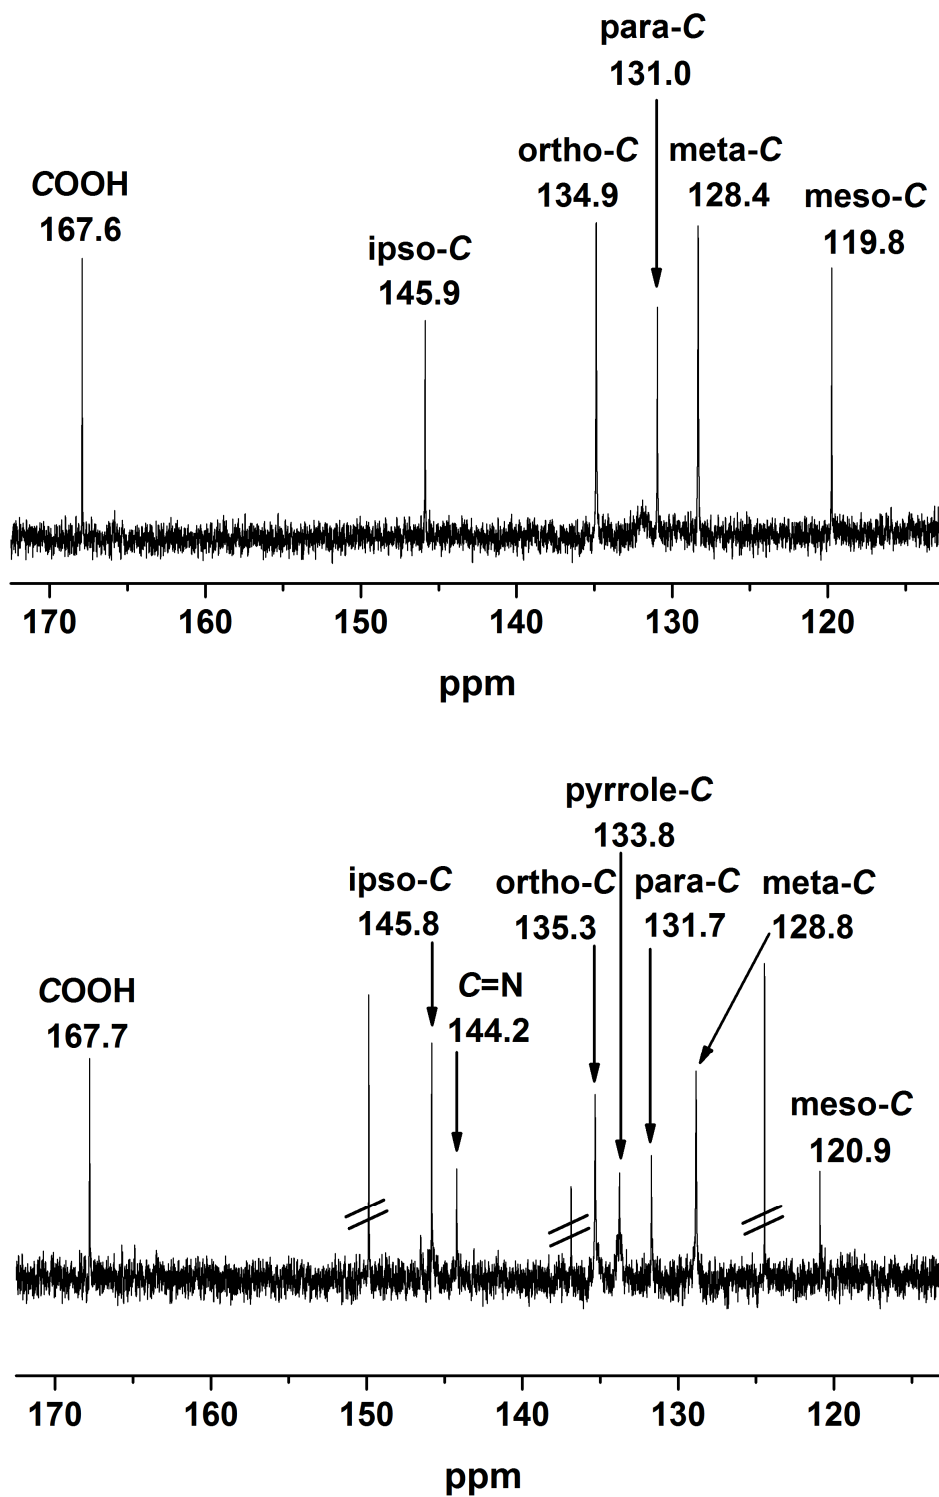

**Figure S2.** Normalised absorption (black) and emission (red) spectra for aqueous solutions of **1**. The blue line shows the Gaussian fit for the 0-1-absorbion transition used to determine  $E_{00}$  by the “intercept-method”.

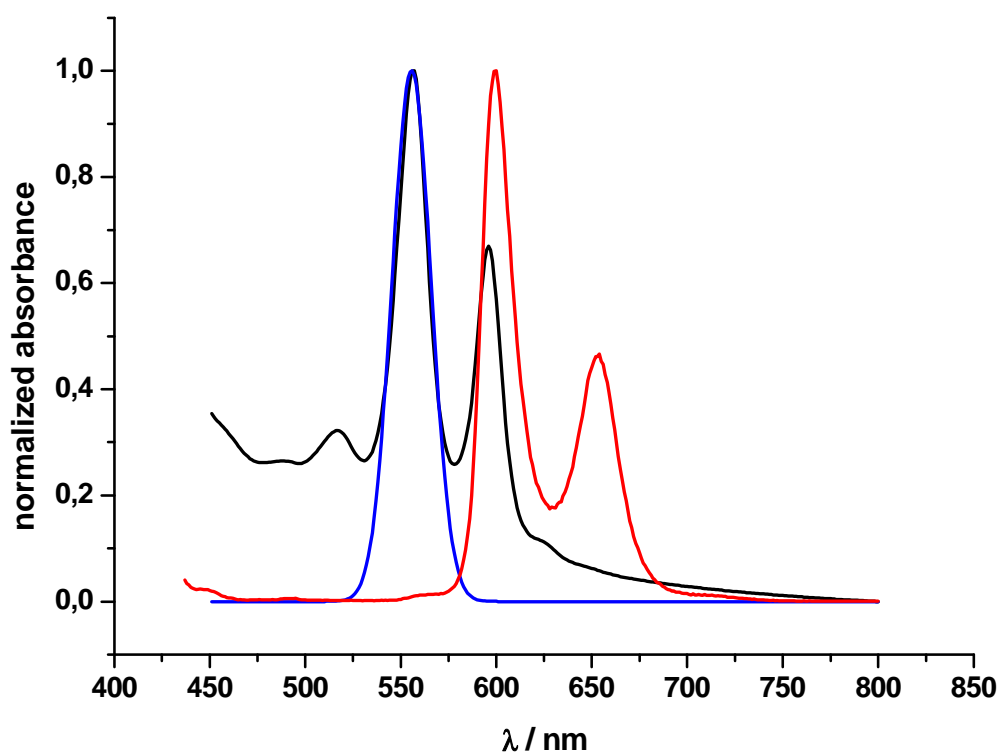

**Table S1.** Values obtained for  $E_{00}$  of **1** by using either the medium wavelength between corresponding absorbance and fluorescence peaks (method A) or the “intercept-method” (B).

| method | transition | $E_{00}$ / eV |
|--------|------------|---------------|
| A      | $Q_{0-1}$  | 2.14          |
|        | $Q_{0-0}$  | 1.98          |
| B      | $Q_{0-1}$  | 2.13          |
|        | $Q_{0-0}$  | 2.00          |

**Figure S3.** Aggregation studies of compound **1**: Absorbance at 557 nm in absorption spectra of different concentrations of **1** ( $10^{-6}$  -  $10^{-3}$  M). All solutions were prepared in phosphate buffer (0.1 M, pH 7).

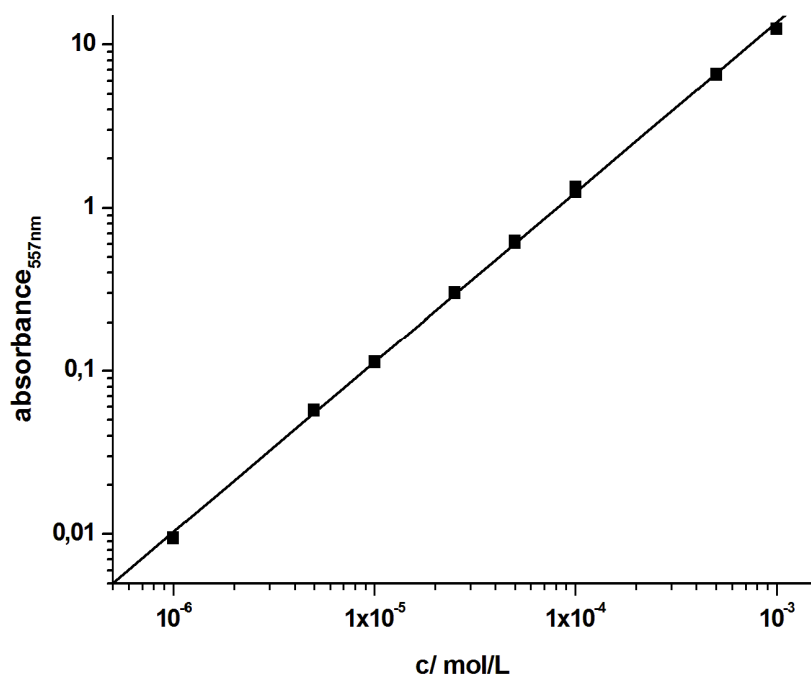

**Figure S4.** Differential pulse voltammogram (DPV) of **1** (straight line) measured with a mercury electrode (hanging mode) from 0 V to -1.2 V in neutral phosphate buffer ( $[1]=0.5$  mM). The dashed line shows the electrolyte background (phosphate buffer, 0.5 M, pH7).

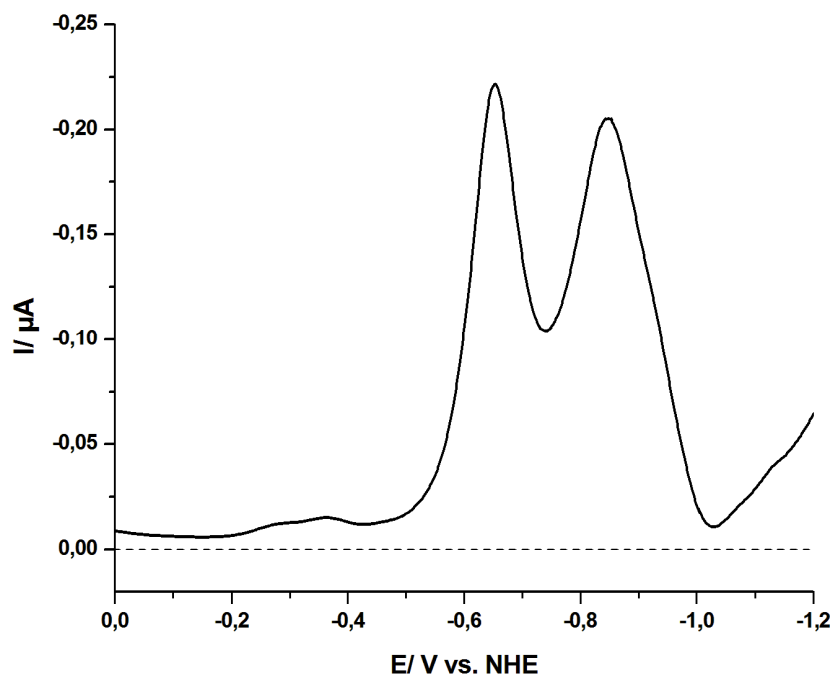

**Figure S5.** Reductive cyclic voltammogram (CV) of **1** in aqueous phosphate buffer ( $[1]=0.5$  mM) measured with a mercury electrode as working electrode. It shows a re-oxidation wave at  $-0.42$  V vs. NHE, most likely caused by tin amalgam formation during the measurement. The dashed line shows the electrolyte background (phosphate buffer,  $0.5$  M, pH 7).

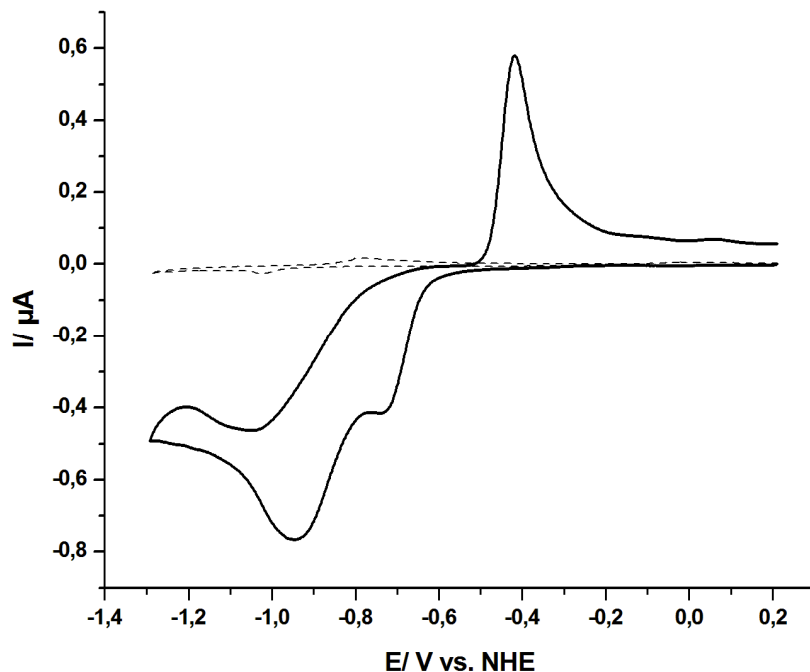

**Figure S6.** DPV of **1** (straight line) and tin(II) chloride  $\text{SnCl}_2$  (dashed line) measured with a mercury electrode (hanging mode) ( $[1]$ ,  $[\text{SnCl}_2]=0.5$  mM). The DPV was measured from  $-1.4$  V to  $0$  V, with an equilibration time of  $5$  seconds at  $-1.4$  V and a scan rate of  $20$  mV/s. The black line shows the electrolyte background (phosphate buffer,  $0.5$  M, pH7).

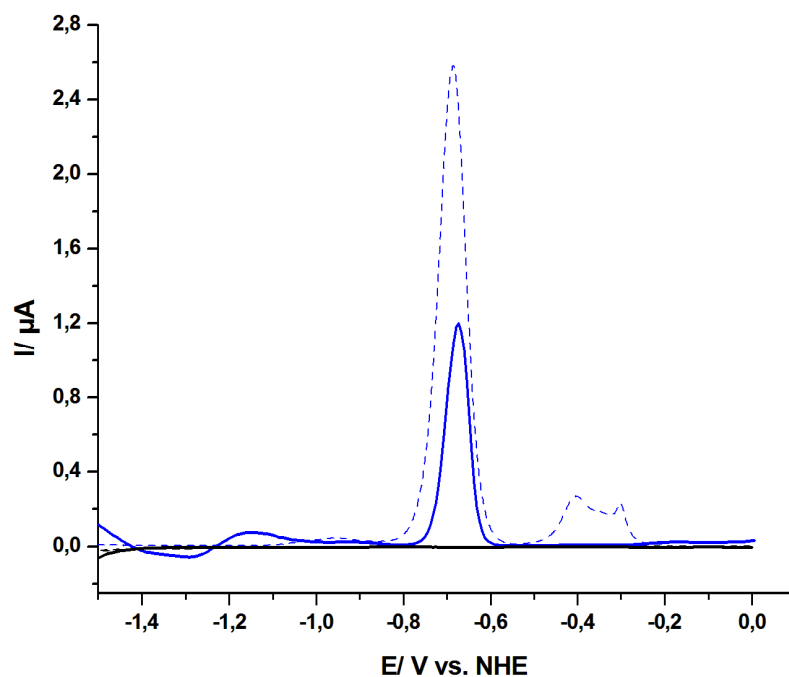

**Figure S7.** CV of **1** in aqueous phosphate buffer ( $[1]=0.5$  mM) measured with a *glassy carbon electrode* as working electrode. The dashed line shows the electrolyte background (phosphate buffer, 0.5 M, pH7).

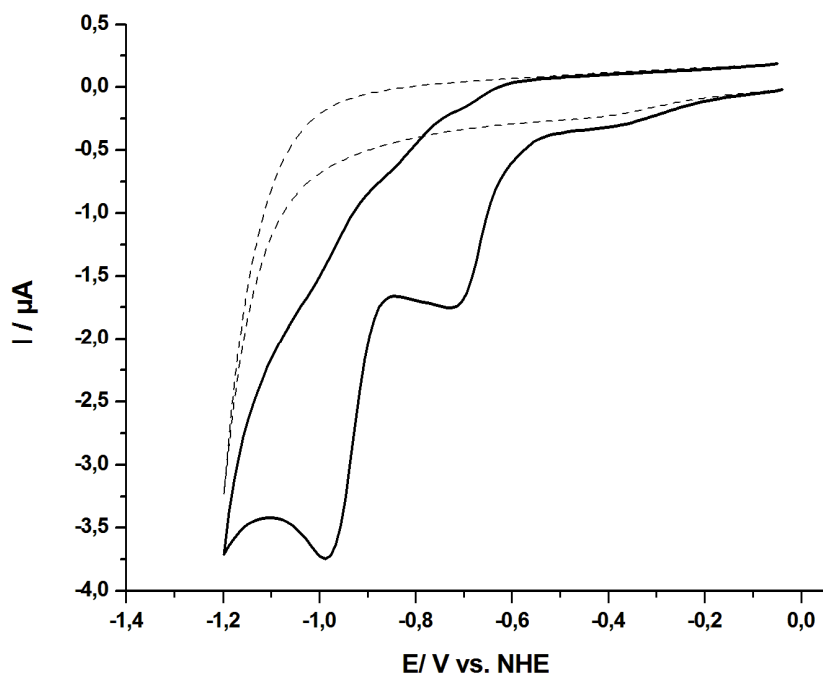

**Figure S8.** CVs (straight lines) and DPVs (dashed lines) of the quenchers methyl viologen (blue), triethanolamine (red) and ethylenediamine-tetraacetic acid (green) in aqueous phosphate buffer ( $[Quencher]=1$  mM) measured with a *glassy carbon electrode* as working electrode. The dotted black line shows the electrolyte background (phosphate buffer, 0.5 M, pH7).

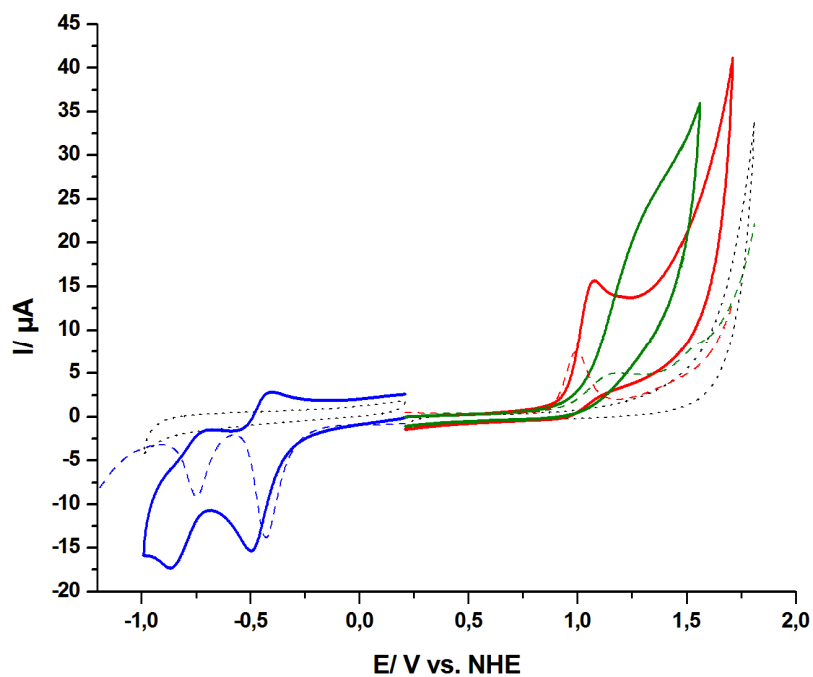

**Figure S9.** Aggregation studies of compound **1** in a higher concentration range (1- 6 mM): Absorbance at 557 nm in absorption spectra of different concentrations of **1**. All solutions were prepared in phosphate buffer (0.1 M, pH 7).

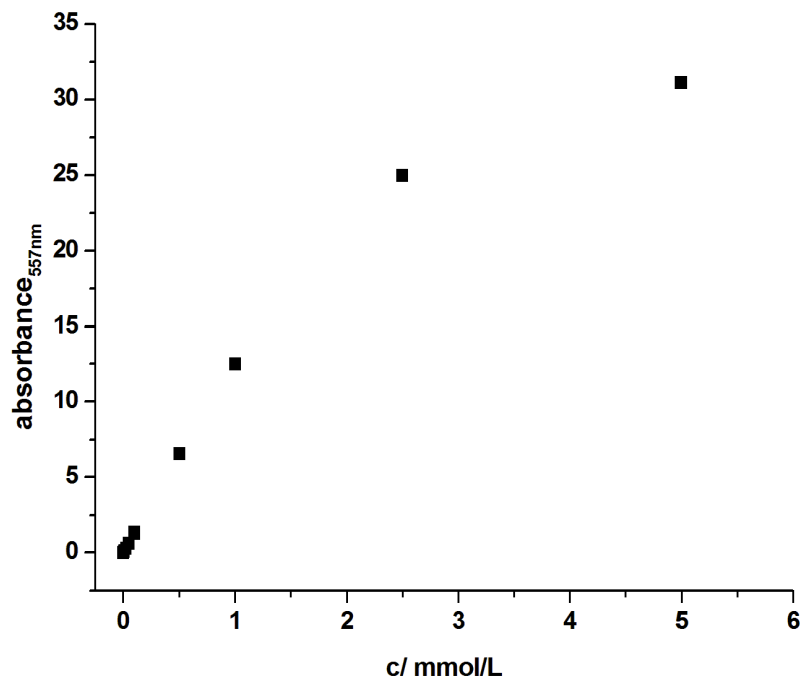

**Figure S10.** Absorption spectra of 10  $\mu$ M SnTPPC (Q-bands 100  $\mu$ M) after irradiation of a “quencher-only system” (0.5 mM SnTPPC and 50 mM TEOA in 0.1M neutral phosphate buffer) for 0, 30, 90, 150, 180 min..

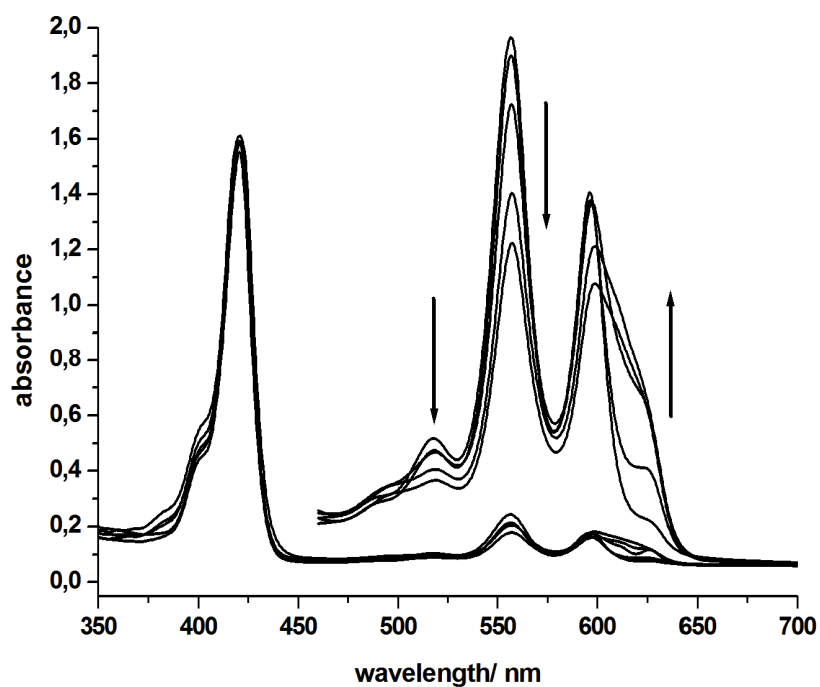



**Figure S11.** Cyclic voltammograms of **1** in aqueous phosphate buffer at different pH values ( $[1]=0.5$  mM, total phosphate concentration 0.5M): pH 5 (black), pH 6 (blue), pH 7 (red) and pH 8 (green).

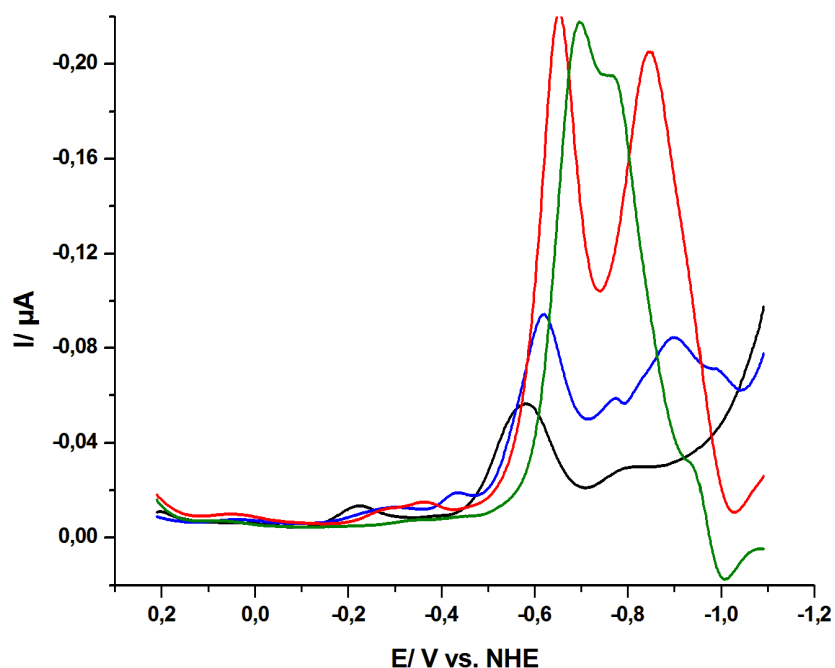

**Figure S12.** A section of the structure of the multi-domain enzyme Photosystem II, highlighting the position of the central pigment P680, an arrangement of four interacting chlorophylls. The molecules of the electron transfer chain, chlorophylls, pheophytin and quinones (in green and purple), are arranged inside the hydrophobic membrane space with virtually no water molecules nearby. In contrast, the OEC (below left) as catalytic site for water-oxidation is surrounded by water.

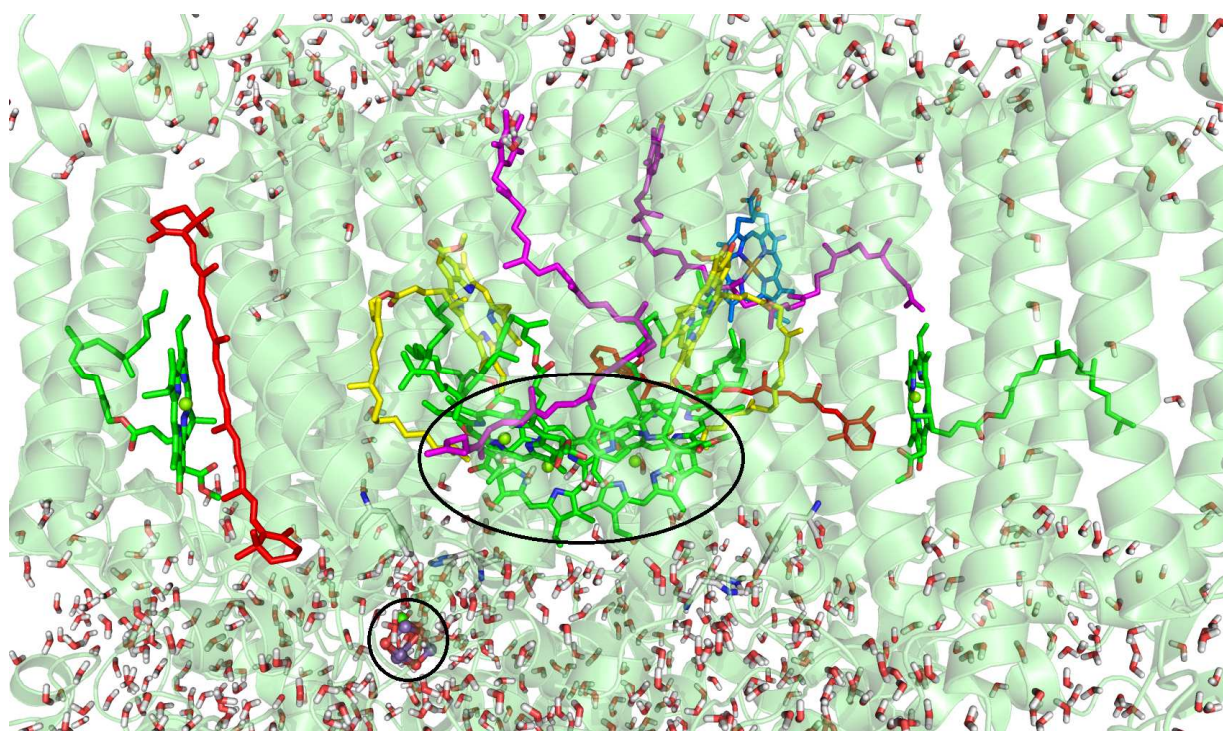

**Figure S13.** *Top:* MALDI-TOF-MS spectrum for **1** from a CI-CCA matrix. *Below:* Measured and simulated signal for the peak detected at  $m/z = 943$ .

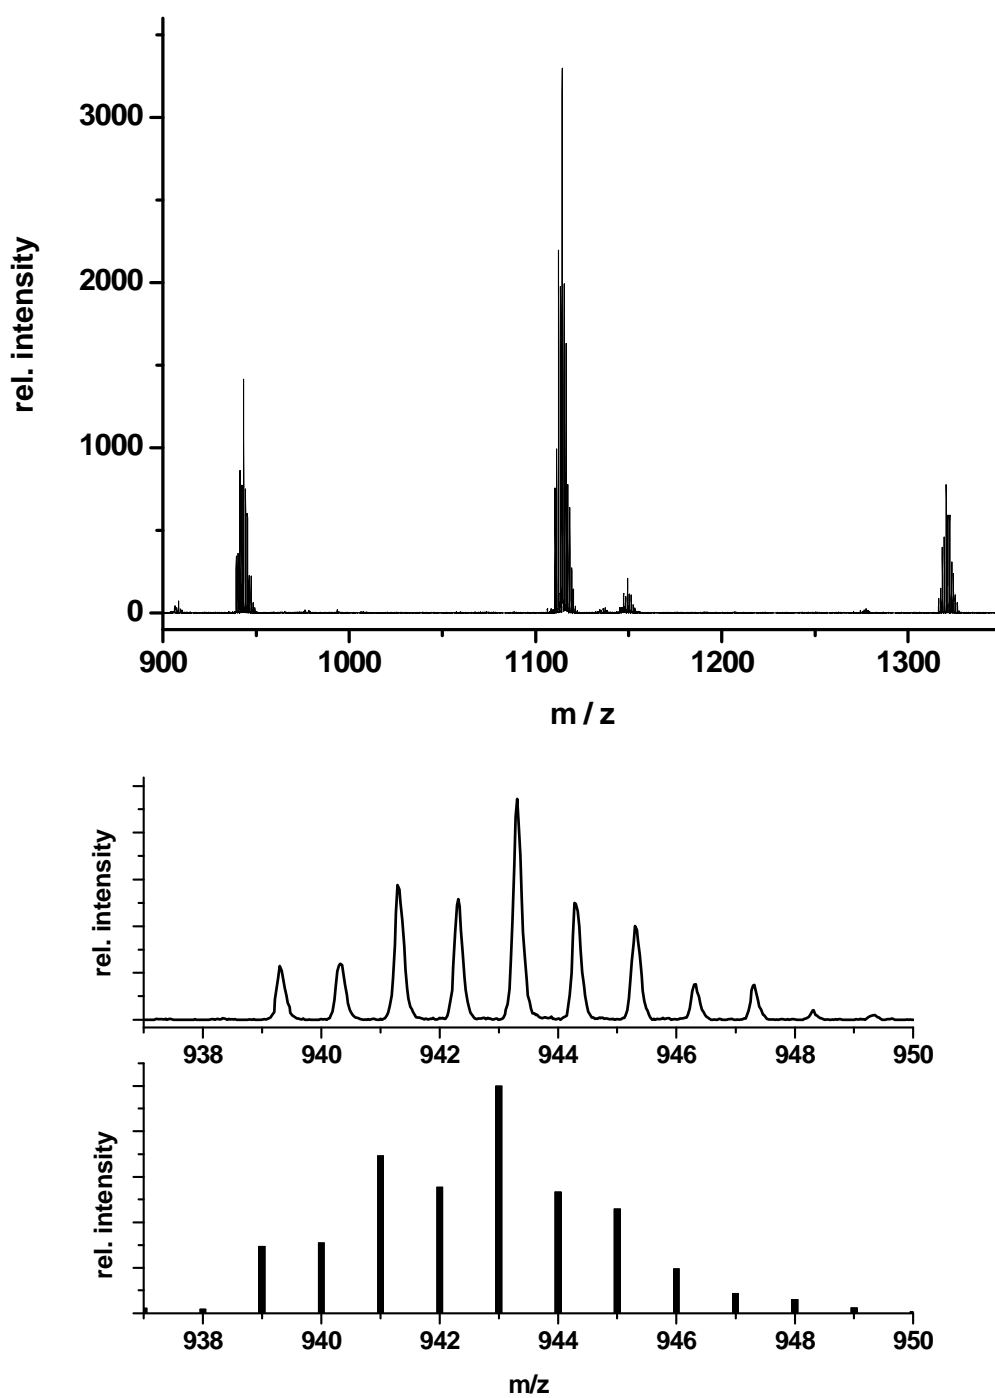

Supplement: c3cp55023k1.pdf [file c3cp55023k1.pdf]
